# Supplementary material for: Fast and highly efficient purification of 6×histidine-tagged recombinant proteins by Ni-decorated MnFe2O4@SiO2@NH2@2AB as novel and efficient affinity adsorbent magnetic nanoparticles
Source: Royal Society of Chemistry journal article supplement (doi:10.1039/c5ra25949e), 2016-01-01
Supplement: c5ra25949e1.pdf [file c5ra25949e1.pdf]

## Fast and highly efficient purification of 6×histidine-tagged recombinant proteins by Ni-decorated $\text{MnFe}_2\text{O}_4@\text{SiO}_2@\text{NH}_2@2\text{AB}$ as a novel and efficient affinity adsorbent magnetic nanoparticles

Zahra Rashid,<sup>1</sup> Hossein Naeimi,<sup>1</sup> Amir-Hassan Zarnani,<sup>2,3</sup> Mahboobeh Nazari,<sup>4</sup> Mohammad-Reza Nejadmoghaddam,<sup>4,5</sup> and Ramin Ghahremanzadeh<sup>\*4</sup>

<sup>1</sup>Department of Organic Chemistry, Faculty of Chemistry, University of Kashan, Kashan, 87317, I.R. Iran.

<sup>2</sup>Reproductive Immunology Research Center, Avicenna Research Institute, ACECR, Tehran, Iran.

<sup>3</sup>Immunology Research Center, Iran University of Medical Sciences, Tehran, Iran.

<sup>4</sup>Nanobiotechnology Research Center, Avicenna Research Institute, ACECR, Tehran, Iran.

<sup>5</sup>Nanobiotechnology Research Center, Faculty of Pharmacy, Tehran University of Medical Science (TUMS), Tehran, Iran.

### SUPPORTING INFORMATION

| <i>List of contents</i>                                                                       | <i>Page</i> | <i>List of contents</i>                                                              | <i>Page</i> |
|-----------------------------------------------------------------------------------------------|-------------|--------------------------------------------------------------------------------------|-------------|
| Title, author's name, address                                                                 | 1           | S6. TGA curves of magnetic nanoparticles                                             | 6           |
| S1. Steps for fabricating of $\text{MnFe}_2\text{O}_4@\text{SiO}_2@\text{NH}_2@2\text{AB-Ni}$ | 2           | S7. EDX spectrum of $\text{MnFe}_2\text{O}_4@\text{SiO}_2@\text{NH}_2@2\text{AB-Ni}$ | 6           |
| S2. FT-IR spectra of magnetic nanoparticles                                                   | 3           | S8. SDS-PAGE analysis                                                                | 7           |
| S3. XRD patterns of magnetic nanoparticles                                                    | 4           |                                                                                      |             |
| S4. The SEM image of magnetic nanoparticles                                                   | 5           |                                                                                      |             |
| S5. Magnetization curves of magnetic nanoparticles                                            | 5           |                                                                                      |             |

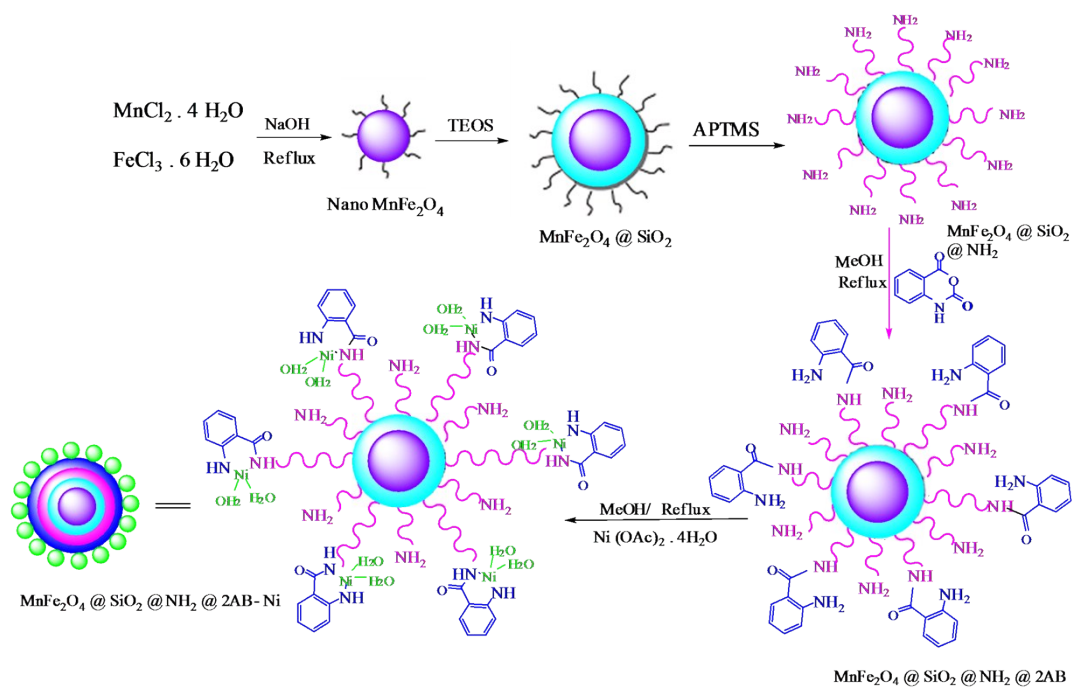

S1. Steps for fabricating of  $\text{MnFe}_2\text{O}_4 @ \text{SiO}_2 @ \text{NH}_2 @ 2\text{AB-Ni}$

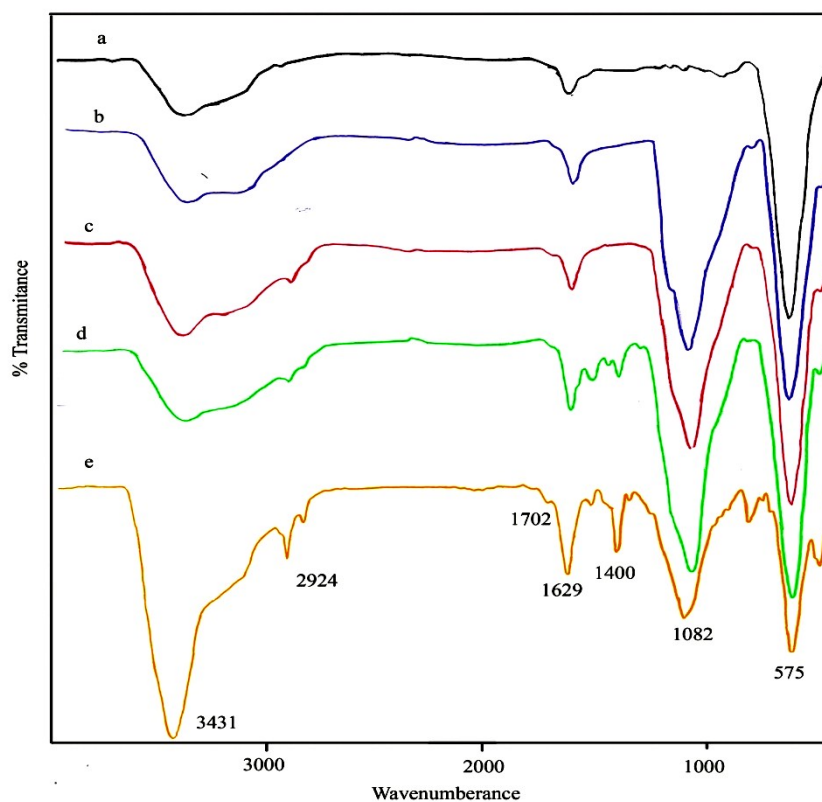

S2. The comparative FT-IR spectra for (a)  $\text{MnFe}_2\text{O}_4$ , (b)  $\text{MnFe}_2\text{O}_4@\text{SiO}_2$ , (c)  $\text{MnFe}_2\text{O}_4@\text{SiO}_2@\text{NH}_2$ , (d)  $\text{MnFe}_2\text{O}_4@\text{SiO}_2@\text{NH}_2@2\text{AB}$ , and (e)  $\text{MnFe}_2\text{O}_4@\text{SiO}_2@\text{NH}_2@2\text{AB}-\text{Ni}$ .

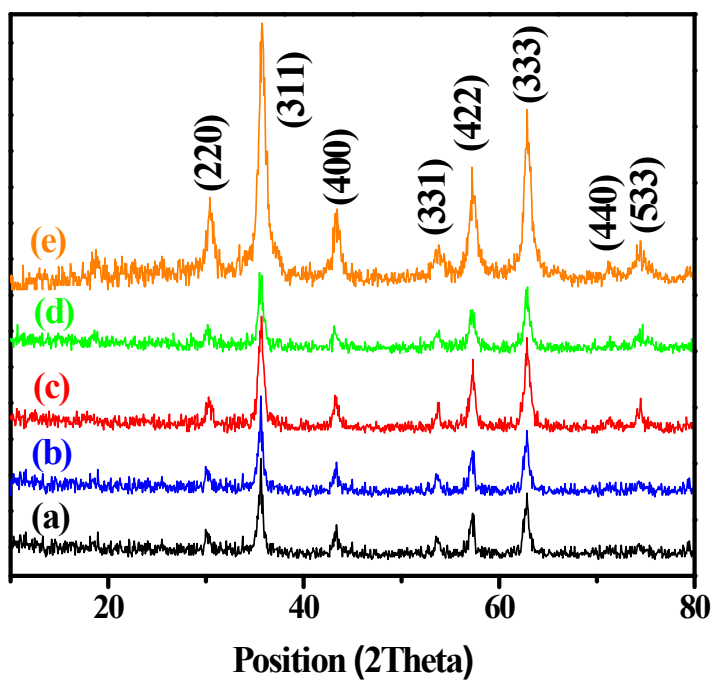

S3. XRD patterns of (a)  $\text{MnFe}_2\text{O}_4$ , (b)  $\text{MnFe}_2\text{O}_4@\text{SiO}_2$ , (c)  $\text{MnFe}_2\text{O}_4@\text{SiO}_2@\text{NH}_2$ , (d)  $\text{MnFe}_2\text{O}_4@\text{SiO}_2@\text{NH}_2@2\text{AB}$ , and (e)  $\text{MnFe}_2\text{O}_4@\text{SiO}_2@\text{NH}_2@2\text{AB-Ni}$ .

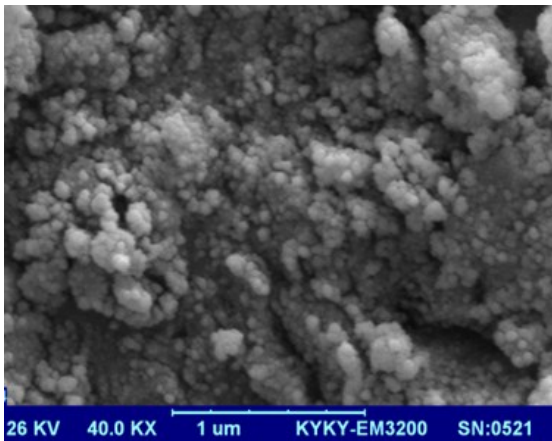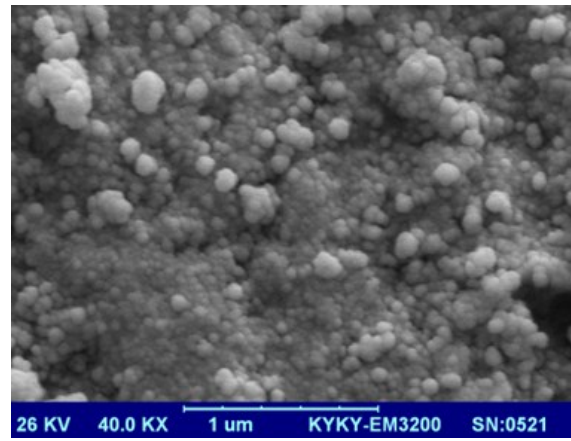

S4. The SEM image of (a)  $\text{MnFe}_2\text{O}_4$  and (b)  $\text{MnFe}_2\text{O}_4@\text{SiO}_2@\text{NH}_2@2\text{AB-Ni}$ .

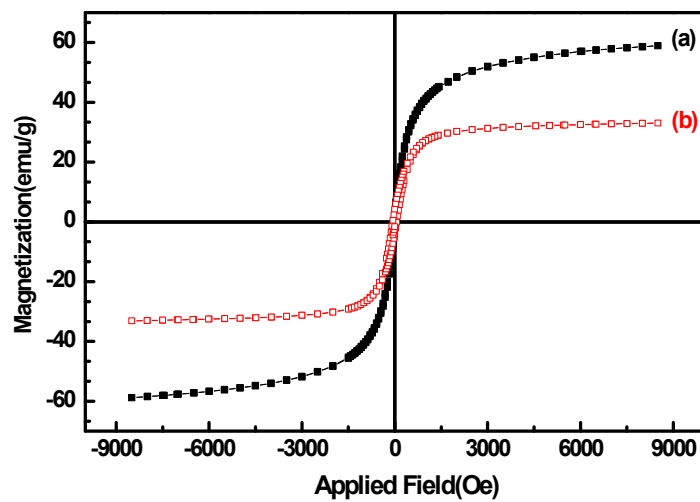

S5. Magnetization curves for the prepared  $\text{MnFe}_2\text{O}_4$  (a) and  $\text{MnFe}_2\text{O}_4@\text{SiO}_2@\text{NH}_2@2\text{AB-Ni}$  (b) at 40 °C.

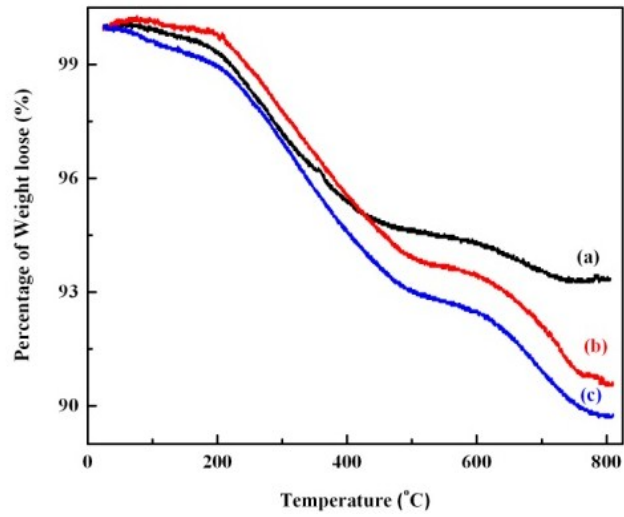

S6. TGA curves of (a)  $\text{MnFe}_2\text{O}_4@\text{SiO}_2@\text{NH}_2$ , (b)  $\text{MnFe}_2\text{O}_4@\text{SiO}_2@\text{NH}_2@2\text{AB}$ , and (c)  $\text{MnFe}_2\text{O}_4@\text{SiO}_2@\text{NH}_2@2\text{AB-Ni}$ .

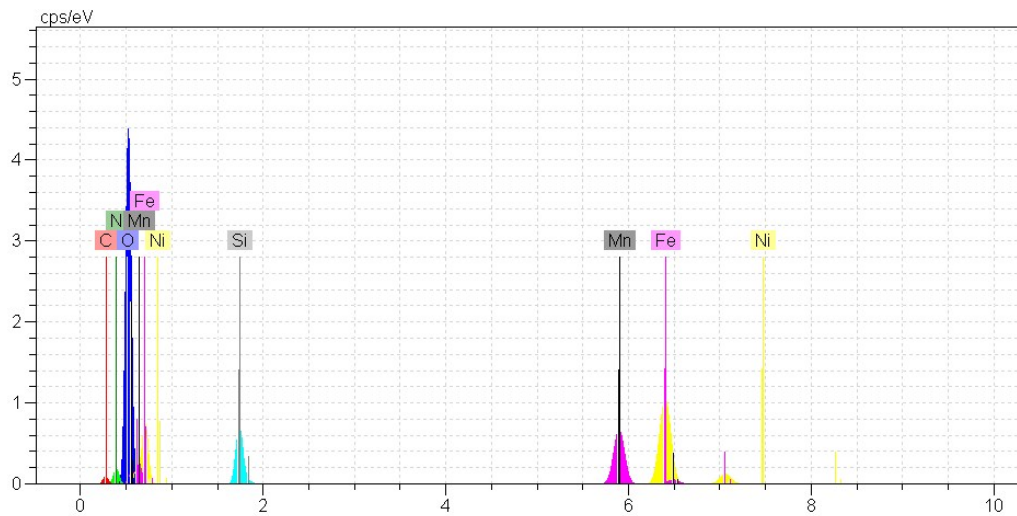

S7. EDX spectrum of  $\text{MnFe}_2\text{O}_4@\text{SiO}_2@\text{NH}_2@2\text{AB-Ni}$ .

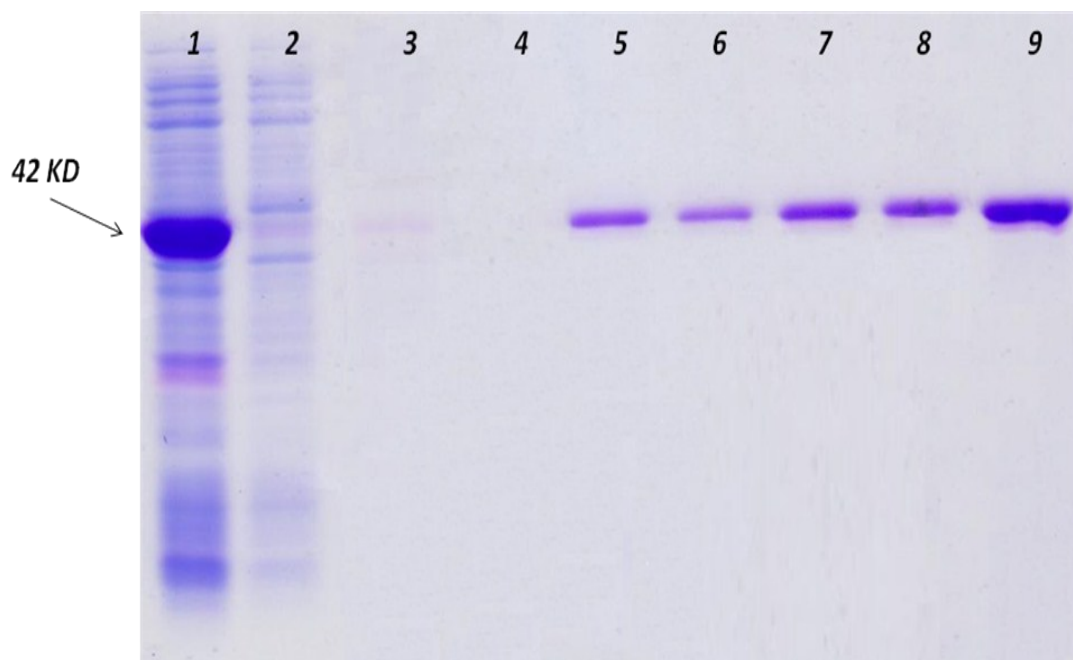

S8. SDS-PAGE analysis of 6× His-tagged protein-A purification by MnFe<sub>2</sub>O<sub>4</sub>@SiO<sub>2</sub>@NH<sub>2</sub>@2AB-Ni magnetic nanoparticles. Lane 1: SCE, Lane 2: Flow through, Lane 3: W<sub>1</sub>, Lane 4: W<sub>4</sub>, Lane 5: E<sub>100</sub>, Lane 6: E<sub>100</sub>, Lane 7: E<sub>250</sub>, Lane 8: E<sub>250</sub>, Lane 9: E<sub>500</sub>.
